# Supplementary material for: Self-Efficacy as a Mediator of the Impact of Social Capital on Entrepreneurial Orientation: A Case of Dayak Ethnic Entrepreneurship
Source: MDPI journal article supplement (doi:10.3390/su14095620), 2022-05-06
Supplement: s1 [file s1]

**Supplementary Table S1. SURVEY MEASUREMENT.**

**SOCIAL CAPITAL**

| NO | ITEMS FROM LITERATURE                                                                                                               | BAHASA INDONESIA TRANSLATION                                                                                                                         | BACK TRANSLATION                                                                                                                     |
|----|-------------------------------------------------------------------------------------------------------------------------------------|------------------------------------------------------------------------------------------------------------------------------------------------------|--------------------------------------------------------------------------------------------------------------------------------------|
| 1. | How do you rate the number of your friends?                                                                                         | Bagaimana Anda menilai jumlah teman Anda?                                                                                                            | How would you rate your number of friends?                                                                                           |
| 2. | How do you rate the number of your country fellows/old classmates?                                                                  | Bagaimana Anda menilai jumlah teman sebangsa atau teman sekelas Anda?                                                                                | How would you rate your number of fellow countrymen or classmates?                                                                   |
| 3. | Among your coworkers/fellows, how many you can trust?                                                                               | Di antara semua rekan kerja Anda, berapa banyak yang dapat Anda percaya?                                                                             | From all of your co-workers, how many of them are trustworthy?                                                                       |
| 4. | Among your relatives, how many you can trust?                                                                                       | Di antara semua anggota keluarga besar Anda, berapa banyak yang dapat Anda percaya?                                                                  | From all of your family members, how many of them are trustworthy?                                                                   |
| 5. | Among all your relatives, neighbors, friends, co-workers, and classmates, how many have broad connections with others?              | Di antara semua anggota keluarga besar, tetangga, teman, rekan kerja, dan teman sekelas, berapa banyak yang memiliki koneksi luas dengan orang lain? | From all of your family members, neighbors, friends, co-workers, and classmates, how many of them have wide connections with others? |
| 6. | Among all your family members, relatives, neighbors, friends, co-workers, and old classmates, how many are with a professional job? | Di antara semua anggota keluarga inti dan besar, tetangga, teman, rekan kerja, serta teman sekelas, berapa banyak yang memiliki profesi profesional? | From all of your family members, neighbors, friends, co-workers, and classmates, how many of them are in a professional profession?  |
| 7. | How many of your coworkers/fellows will                                                                                             | Berapa banyak dari rekan kerja Anda yang pasti akan membantu                                                                                         | How many of your co-workers will definitely help you when asked?                                                                     |

|     |                                                                                                                    |                                                                                                                                |                                                                                                                           |
|-----|--------------------------------------------------------------------------------------------------------------------|--------------------------------------------------------------------------------------------------------------------------------|---------------------------------------------------------------------------------------------------------------------------|
|     | definitely help you upon your request?                                                                             | Anda saat diminta?                                                                                                             |                                                                                                                           |
| 8.  | How many of your friends will definitely help you upon your request?                                               | Berapa banyak dari teman Anda yang pasti akan membantu Anda saat diminta?                                                      | How many of your friends will definitely help you when asked?                                                             |
| 9.  | How do you rate the number of cultural, recreational and leisure groups/organizations in your community?           | Bagaimana Anda menilai jumlah kelompok atau organisasi budaya, rekreasi, dan aktivitas dalam waktu luang dalam komunitas Anda? | How would you rate the number of cultural, recreational, and hobby-and-leisure groups or organizations in your community? |
| 10. | How do you rate the number of governmental, political, economic and social groups/organizations in your community? | Bagaimana Anda menilai jumlah kelompok atau organisasi pemerintahan, politik, ekonomi dan sosial dalam komunitas Anda?         | How would you rate the number of governmental, political, economic and social groups or organizations in your community?  |
| 11. | How many of these groups and organizations possess broad social connections?                                       | Berapa banyak dari kelompok dan organisasi tersebut yang memiliki koneksi sosial yang luas?                                    | How many of those groups and organizations have wide social connections?                                                  |
| 12. | How many of these groups and organizations possess great social influence?                                         | Berapa banyak dari kelompok dan organisasi ini yang memiliki pengaruh besar secara sosial?                                     | How many of those groups and organizations have significant social influence?                                             |
| 13. | How many of the governmental, political, economic and social groups/organizations will help you upon your request? | Berapa banyak dari kelompok atau organisasi pemerintahan, politik, ekonomi dan sosial yang akan membantu Anda saat diminta?    | How many of the governmental, political, economic and social groups or organizations will help you when asked?            |
| 14. | How many of the cultural, recreational and leisure                                                                 | Berapa banyak dari kelompok atau organisasi budaya, rekreasi, dan                                                              | How many of the cultural, recreational, and hobby-and-leisure groups or                                                   |

|  |                                                       |                                                                   |                                         |
|--|-------------------------------------------------------|-------------------------------------------------------------------|-----------------------------------------|
|  | groups/organizations will help you upon your request? | aktivitas dalam waktu luang yang akan membantu Anda saat diminta? | organizations will help you when asked? |
|--|-------------------------------------------------------|-------------------------------------------------------------------|-----------------------------------------|

## ENTREPRENEURIAL ORIENTATION

| NO | ITEMS FROM LITERATURE                                                                                                                               | BAHASA INDONESIA TRANSLATION                                                                                             | BACK TRANSLATION                                                                                       |
|----|-----------------------------------------------------------------------------------------------------------------------------------------------------|--------------------------------------------------------------------------------------------------------------------------|--------------------------------------------------------------------------------------------------------|
| 1. | I like to take bold action by venturing into the unknown                                                                                            | Saya suka mengambil tindakan yang berani dalam berwirausaha                                                              | I like to take intrepid actions in entrepreneurship.                                                   |
| 2. | I am willing to invest a lot of time and/or money on something that might yield a high return                                                       | Saya bersedia menginvestasikan banyak waktu dan/atau modal untuk sesuatu yang mungkin membuahkan banyak hasil.           | I am willing to invest a lot of time and/or money for something that may result in a lot of profit.    |
| 3. | I tend to act "boldly" in situations where risk is involved                                                                                         | Saya cenderung bertindak "dengan berani" dalam berwirausaha meskipun penuh resiko                                        | I tend to act "courageously" in entrepreneurship despite the risks.                                    |
| 4. | I often like to try new and unusual activities that are not typical but not necessarily risky                                                       | Saya sering suka mencoba aktivitas baru, unik, dan tidak umum, asalkan tidak terlalu beresiko.                           | I usually like trying new, unique, uncommon activities, as long as it is not too risky.                |
| 5. | In general, I prefer a strong emphasis in projects on unique, one-of-a-kind approaches rather than revisiting tried and true approaches used before | Dalam berwirausaha Saya lebih suka menggunakan pendekatan yang unik daripada pendekatan yang pernah dilakukan sebelumnya | In entrepreneurship, I prefer using unique approaches than approaches already implemented in the past. |

|     |                                                                                                                                               |                                                                                                                                          |                                                                                                          |
|-----|-----------------------------------------------------------------------------------------------------------------------------------------------|------------------------------------------------------------------------------------------------------------------------------------------|----------------------------------------------------------------------------------------------------------|
| 6.  | I prefer to try my own unique way when learning new things rather than doing it like everyone else does                                       | Saya lebih suka mencoba cara unik saya sendiri ketika membuka usaha baru daripada meniru seperti yang dilakukan orang lain               | I prefer trying my own unique way in opening new business rather than copying what others do.            |
| 7.  | I favour experimentation and original approaches to problem solving rather than using methods others generally use for solving their problems | Saya suka mencoba cara yang berbeda dalam memecahkan masalah daripada menggunakan cara pemecahan masalah yang biasa digunakan orang lain | I am fond of trying different problem-solving methods rather than using methods commonly used by others. |
| 8.  | I usually act in anticipation of future problems, needs or changes                                                                            | Saya biasanya bertindak untuk mengantisipasi masalah, kebutuhan, atau perubahan di masa depan                                            | I usually act to anticipate future problems, needs, or changes.                                          |
| 9.  | I tend to plan ahead on projects                                                                                                              | Saya merencanakan usaha saya ke depannya                                                                                                 | I plan my future efforts.                                                                                |
| 10. | I prefer to “step-up” and get things going on projects rather than sit and wait for someone else to do it                                     | Saya lebih suka mengembangkan usaha sendiri daripada menunggu orang lain yang melakukannya.                                              | I prefer developing my own business rather than waiting for others to do so.                             |

#### SELF-EFFICACY

| NO | ITEMS FROM LITERATURE                                           | BAHASA INDONESIA TRANSLATION                                       | BACK TRANSLATION                                       |
|----|-----------------------------------------------------------------|--------------------------------------------------------------------|--------------------------------------------------------|
| 1. | I will be able to achieve most of the goals that I have set for | Saya mampu mencapai sebagian besar tujuan yang telah saya tetapkan | I am able to achieve most goals I have set for myself. |

|    |                                                                         |                                                                                                 |                                                                                      |
|----|-------------------------------------------------------------------------|-------------------------------------------------------------------------------------------------|--------------------------------------------------------------------------------------|
|    | myself                                                                  | untuk diri saya                                                                                 |                                                                                      |
| 2. | When facing difficult tasks, I am certain that I will accomplish them   | Ketika menghadapi tugas yang sulit, saya yakin bahwa saya akan dapat menyelesaikannya           | During difficult tasks, I am sure that I will be able to complete it.                |
| 3. | In general, I think that I can obtain outcomes that are important to me | Secara umum, saya pikir bahwa saya dapat memperoleh hasil yang penting bagi saya                | In general, I think that I am capable of achieving results that I deem as important. |
| 4. | I believe I can succeed at most any endeavor to which I set my mind     | Saya percaya saya akan berhasil pada sebagian besar upaya yang saya tetapkan dalam pikiran saya | I believe that I will succeed in most efforts I have set to do in my thoughts.       |
| 5. | I will be able to successfully overcome many challenges                 | Saya akan berhasil mengatasi banyak tantangan                                                   | I will be successful in surmounting numerous challenges.                             |
| 6. | I am confident that I can perform effectively on many different tasks   | Saya percaya diri bahwa saya dapat melakukan banyak tugas yang berbeda-beda secara efektif      | I am confident that I am capable of undertaking many different tasks effectively.    |
| 7. | Compared to other people, I can do most tasks very well                 | Dibandingkan dengan orang lain, saya sering kali dapat mengerjakan tugas dengan baik            | Compared to others, I am usually able to do tasks well.                              |
| 8. | Even when things are tough, I can perform quite well                    | Bahkan ketika keadaan sedang sulit, saya dapat menjalaninya dengan baik                         | Even in difficult situations, I am able to proceed in it well.                       |
